# Supplementary material
Source: PubMed Central journal article supplement (PMC5601349)
Supplement: AEM.01343-17_zam999118062s1.pdf [file AEM.01343-17_zam999118062s1.pdf]

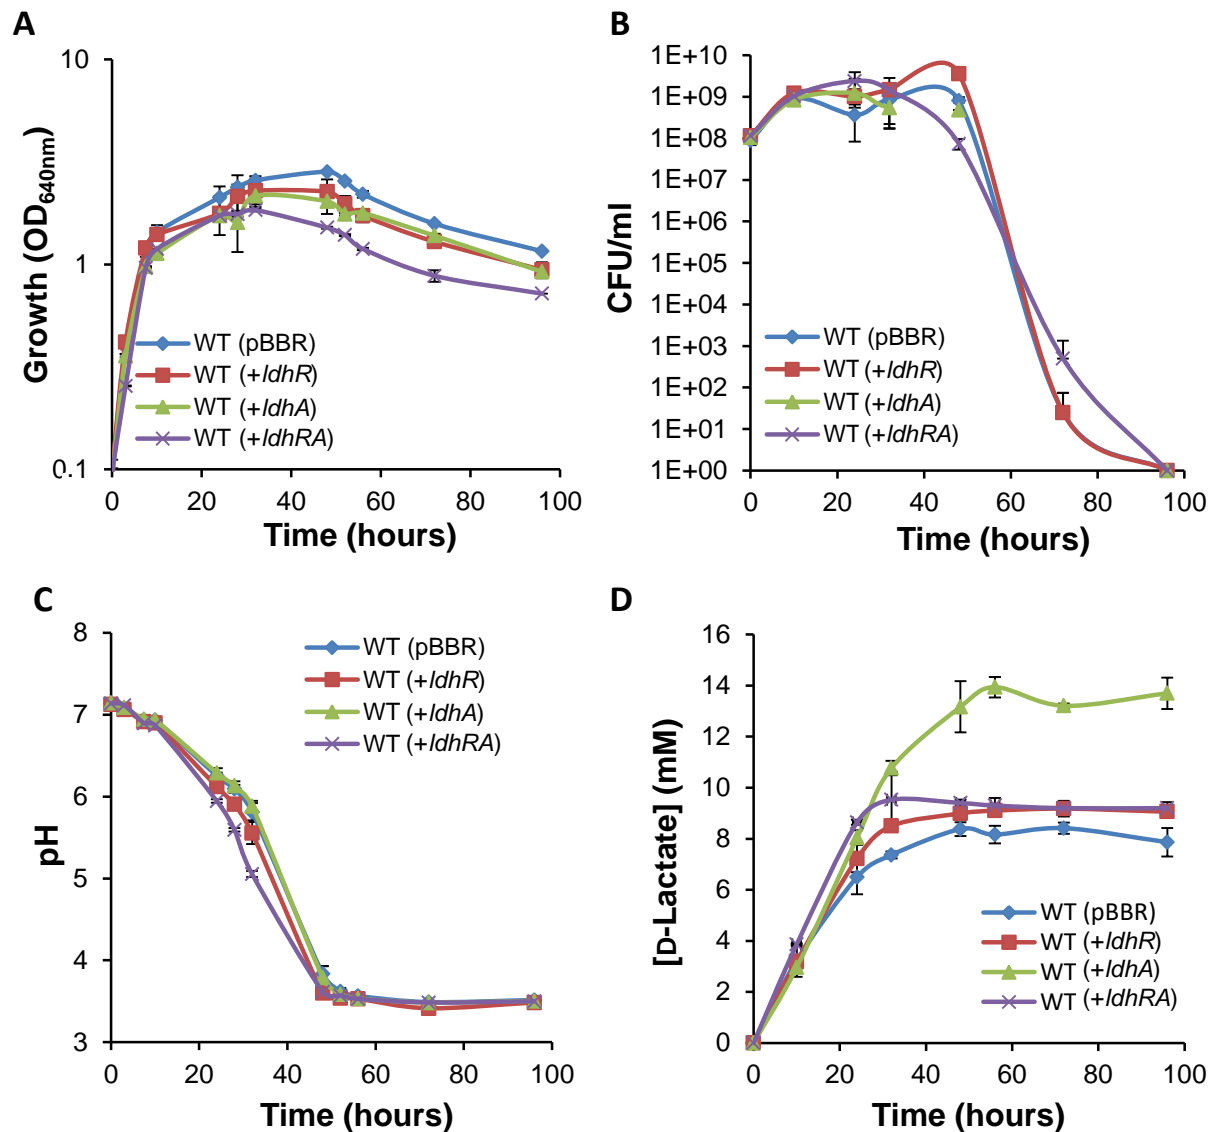

**Fig. S2- Overexpression of genes *ldhR* and *ldhA* in *B. multivorans* ATCC 17616 accelerates the negative effect on cell viability.** Culture growth as measured by turbidity (OD<sub>640nm</sub>) (A) and colony forming units plating (B) of *B. multivorans* ATCC 17616 complemented with the empty vector pBBR1MCS, pMM137-2 expressing *ldhR* gene from the *bce* promoter, pLM016-2 expressing *ldhA* from the *bce* promoter, and pARG015-1 expressing *ldhRA* genes from their own promoter. (C) Culture medium pH measured for the indicated strains. (D) Concentration of D-lactate in the supernatants of *B. multivorans* ATCC 17616 wild-type complemented with the empty vector, or the *ldhR*, *ldhA*, and *ldhRA* genes as measured by HPLC. Genotype symbols are consistent for each panel. Cells were grown in medium supplemented with 2% D-glucose. Error bars indicate the standard deviation.

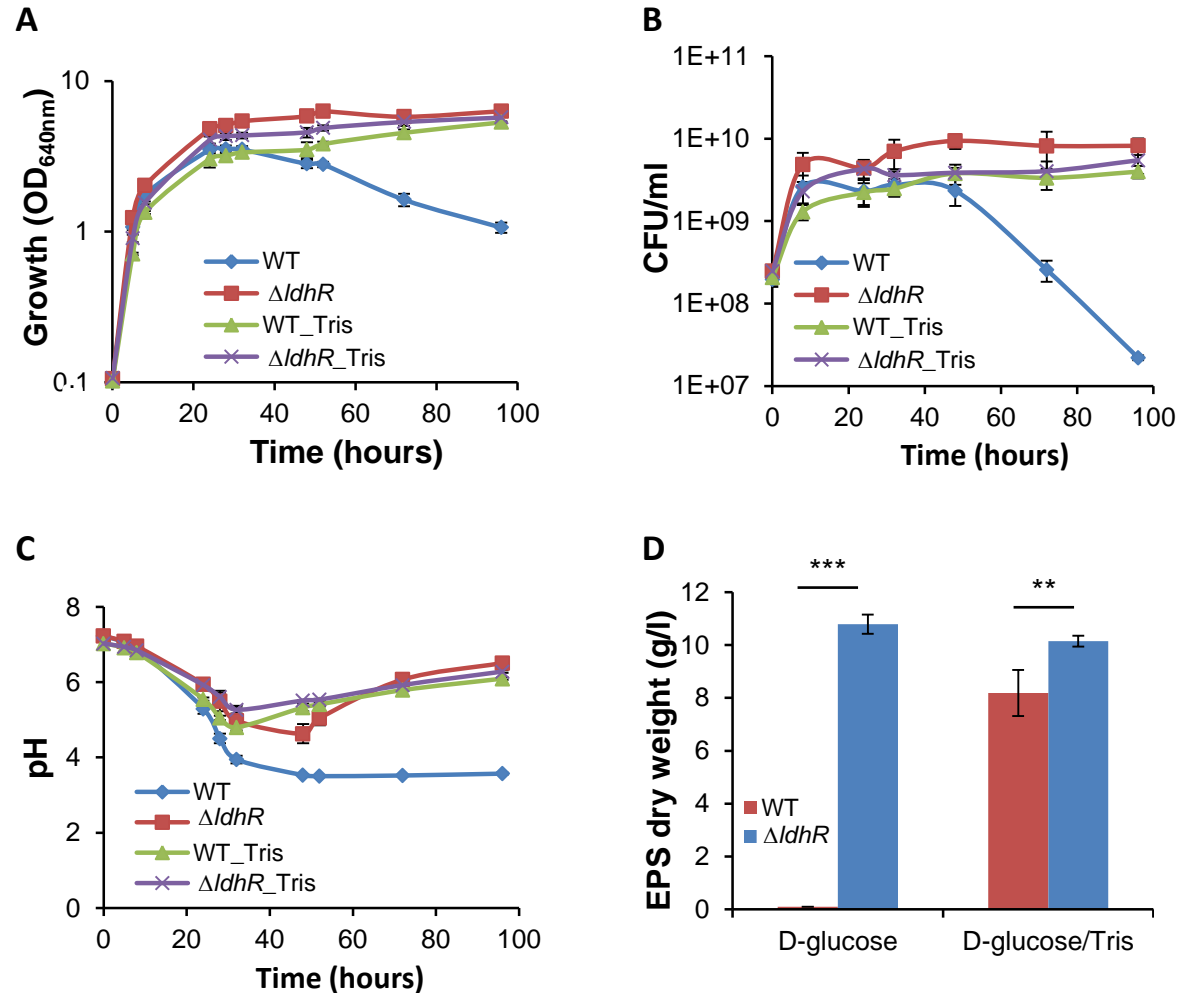

**Fig. S3- Buffering glucose-rich medium prevents extreme acidification, loss of cell viability, and restores polysaccharide production by the wild-type *B. multivorans*.** Culture growth as measured by turbidity (OD<sub>640nm</sub>) (A) and colony forming units plating (B), and culture medium pH (C) of *B. multivorans* ATCC 17616 and the  $\Delta ldhR$  mutant in medium containing 2% D-glucose, unbuffered or buffered with 0.2 M Tris.Cl pH 7.2. (D) EPS production in both media after 96 hours of growth, expressed as ethanol precipitate dry weight (g/l). Significantly greater amount of EPS was produced by the  $\Delta ldhR$  mutant (\*\*,  $P < 0.01$ ; \*\*\*,  $P < 0.001$ ), by Tukey's HSD multiple comparison test. Error bars indicate the standard deviation.

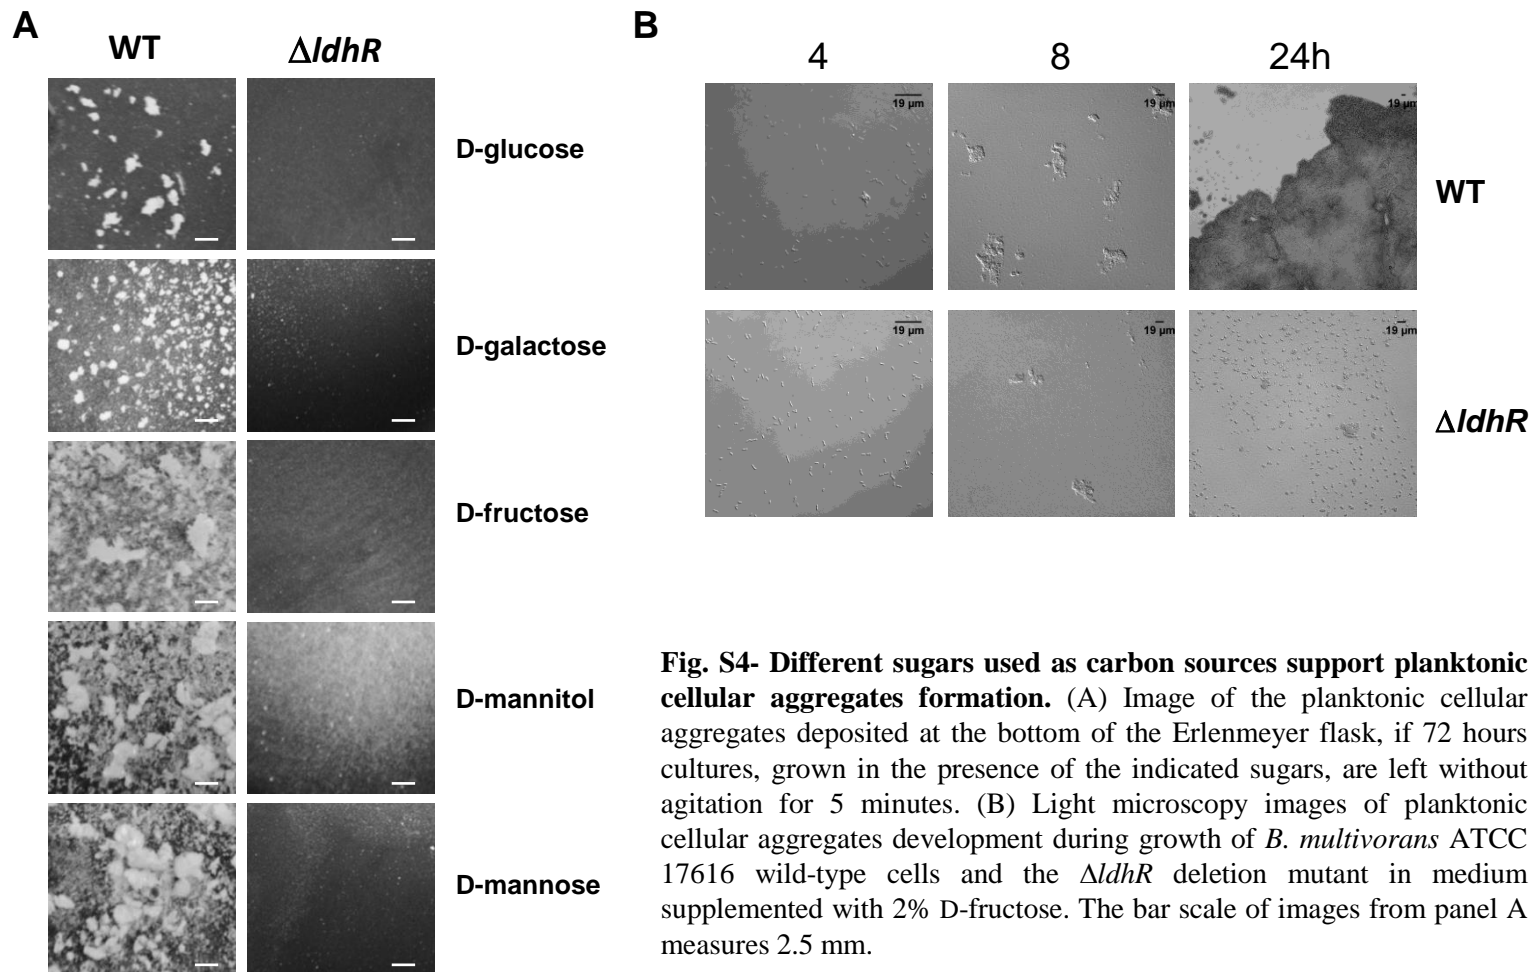

**Fig. S4- Different sugars used as carbon sources support planktonic cellular aggregates formation.** (A) Image of the planktonic cellular aggregates deposited at the bottom of the Erlenmeyer flask, if 72 hours cultures, grown in the presence of the indicated sugars, are left without agitation for 5 minutes. (B) Light microscopy images of planktonic cellular aggregates development during growth of *B. multivorans* ATCC 17616 wild-type cells and the  $\Delta IdhR$  deletion mutant in medium supplemented with 2% D-fructose. The bar scale of images from panel A measures 2.5 mm.
